# Supplementary material for: Programmed switch in the mitochondrial degradation pathways during human retinal ganglion cell differentiation from stem cells is critical for RGC survival
Source: PubMed Central journal article supplement — Redox Biol. 2020 Apr 20;34:101465. doi: 10.1016/j.redox.2020.101465 (PMC7327961; doi:10.1016/j.redox.2020.101465), 2020-04-20
Supplement: mmc2.pdf [file mmc2.pdf]

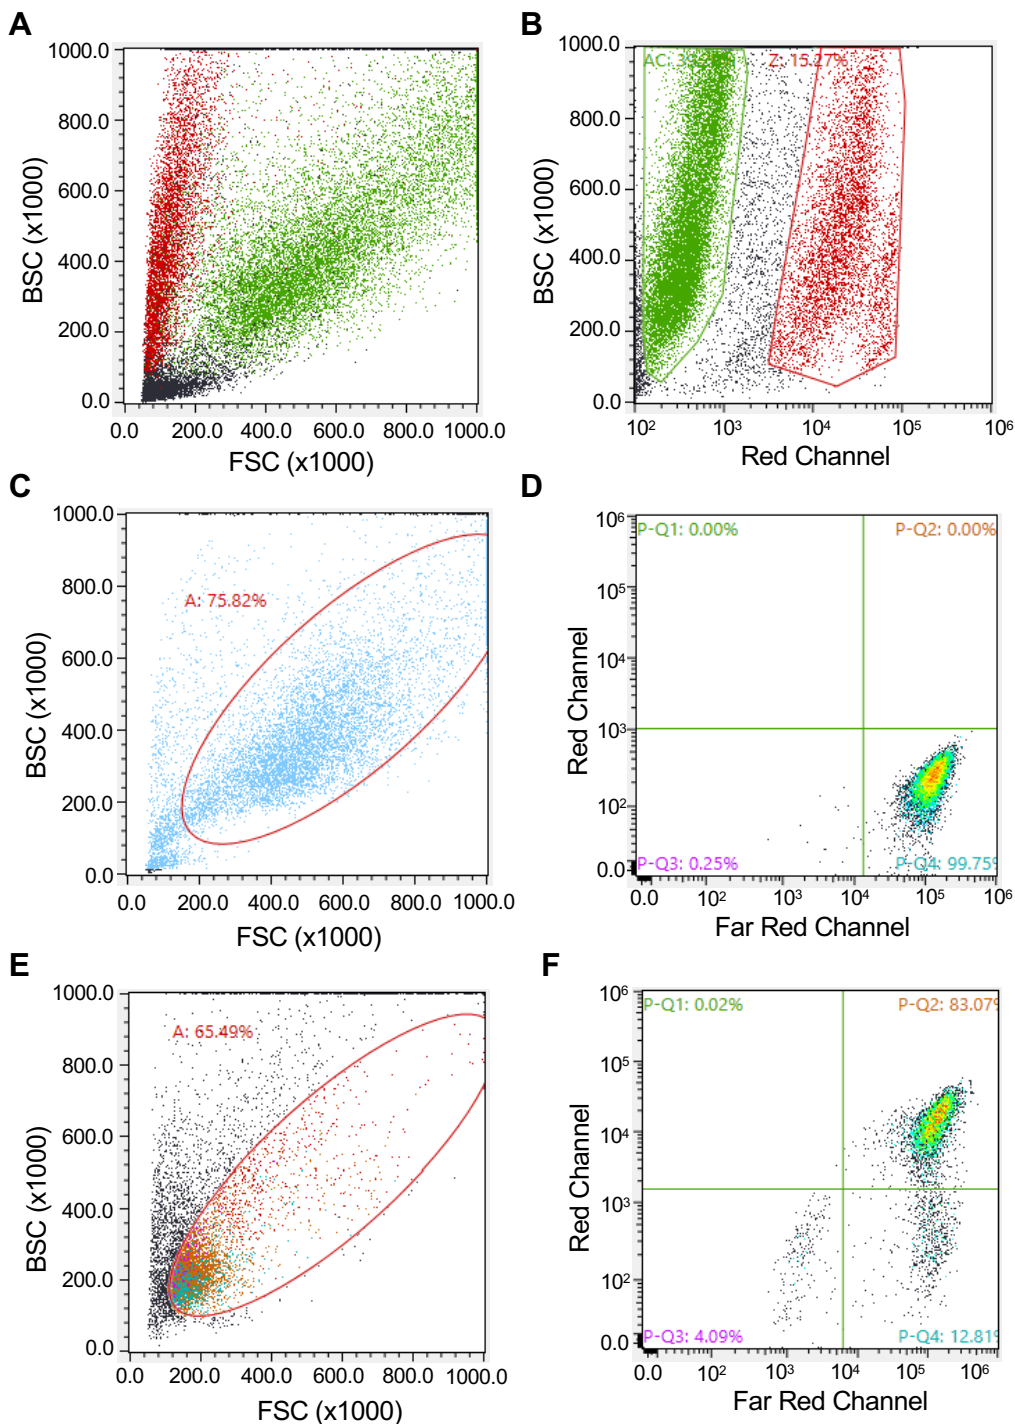

**Supplemental Fig. S2 Flow cytometry-based analysis of the mitochondrial content.** (A) Forward-backward scatter plot of the H9-ESCs labelled with the dead cell dye propidium iodide (PI). (B) Diagonally distributed green dots in 'A' are low in PI intensity representing live cells and red dots along the BSC axis in 'A' are high in PI intensity representing dead cells. This allowed empirical selection of the diagonally distributed live cell population for analysis. (C) Diagonally distributed live H9-ESCs were gated (red oval) for analysis. (D) Live H9-ESCs labelled with mitochondria dye MTDR (far-red) as shown in P-Q4 quadrant were analyzed for average MTDR intensity. (E) Diagonally distributed live H9-RGCs were gated (red oval) for analysis. (F) Live H9-RGCs positive for both tdTomato (red) and MTDR (far-red) distributed in the P-Q2 quadrant were analyzed for average MTDR intensity.
