# Supplementary material for: Programmed switch in the mitochondrial degradation pathways during human retinal ganglion cell differentiation from stem cells is critical for RGC survival
Source: PubMed Central journal article supplement — Redox Biol. 2020 Apr 20;34:101465. doi: 10.1016/j.redox.2020.101465 (PMC7327961; doi:10.1016/j.redox.2020.101465), 2020-04-20
Supplement: mmc3.pdf [file mmc3.pdf]

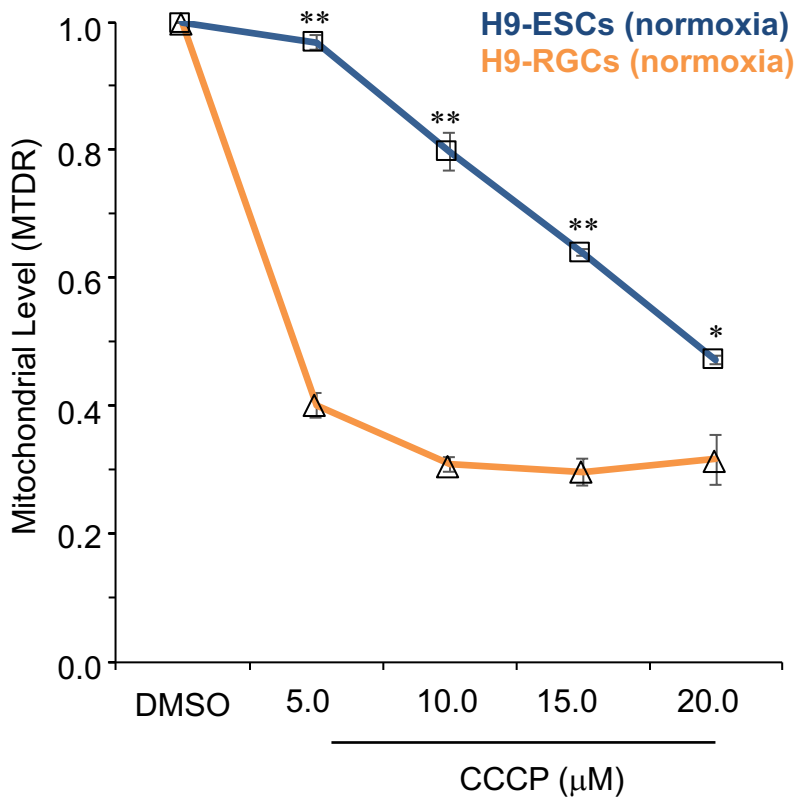

**Supplemental Fig. S3 CCCP induced mitochondrial degradation in stem cells and corresponding RGCs at the normoxia culture condition.** Stem cells and the corresponding RGCs were cultured and treated in the normoxia (5% CO<sub>2</sub>, 20% O<sub>2</sub>) condition with indicated CCCP doses. Graph shows loss of mitochondria labelled MTDR intensity normalized w.r.t DMSO control at different CCCP doses for H9-ESCs compared to the corresponding H9-RGCs. H9-RGC data also presented in Fig. 1H. Data shown are from 3 to 10 independent biological replicates and statistical analysis is done between stem cells and corresponding RGCs at the indicated treatments. Error bars are SEM. \*\*, p-value < 0.005; \*, p-value < 0.05
