# Supplementary material for: Programmed switch in the mitochondrial degradation pathways during human retinal ganglion cell differentiation from stem cells is critical for RGC survival
Source: PubMed Central journal article supplement — Redox Biol. 2020 Apr 20;34:101465. doi: 10.1016/j.redox.2020.101465 (PMC7327961; doi:10.1016/j.redox.2020.101465), 2020-04-20
Supplement: mmc5.pdf [file mmc5.pdf]

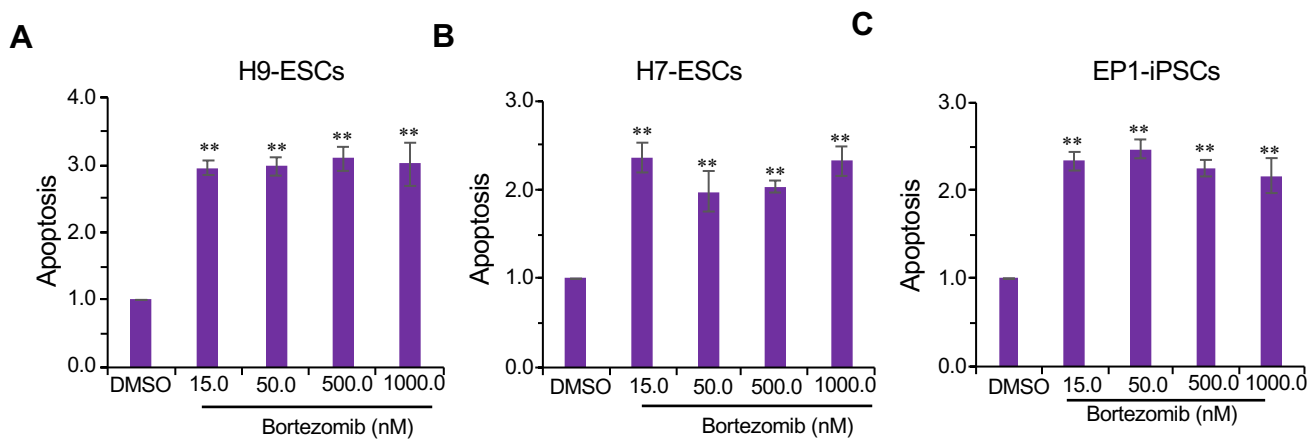

**Supplemental Fig. S5 Activation of cellular apoptosis upon proteasomal inhibition in stem cells.** Cellular apoptosis was measured after 24h treatment with bortezomib at the indicated doses for H9-ESCs (A), H7-ESCs (B) and EP1-iPSCs (C) by measuring luminescence-based caspase-3/7 activity. Data presented are from three independent biological replicates. Error bars are SEM. \*\*, p-value < 0.005
